# Supplementary material
Source: MDPI journal article supplement (https://www.mdpi.com/2306-5338/9/10/175)
Supplement: s1 [file s1]

## Supplementary Material

**Table S1.** Characteristics of studied reservoirs.

| State          | Number of Reservoirs | Total active storage (MCM) |
|----------------|----------------------|----------------------------|
| Alabama        | 1                    | 548                        |
| Arizona        | 1                    | 21881                      |
| Arkansas       | 14                   | 13405                      |
| California     | 31                   | 36035                      |
| Colorado       | 34                   | 4532                       |
| Florida        | 1                    | 172                        |
| Georgia        | 1                    | 360                        |
| Idaho          | 9                    | 7752                       |
| Illinois       | 1                    | 373                        |
| Indiana        | 6                    | 1528                       |
| Kansas         | 10                   | 3119                       |
| Kentucky       | 16                   | 12951                      |
| Louisiana      | 1                    | 626                        |
| Massachusetts  | 1                    | 17                         |
| Minnesota      | 5                    | 636                        |
| Mississippi    | 5                    | 7302                       |
| Missouri       | 7                    | 9469                       |
| Montana        | 1                    | 1995                       |
| Nebraska       | 11                   | 828                        |
| New Hampshire  | 1                    | 54                         |
| New Mexico     | 7                    | 4810                       |
| North Carolina | 3                    | 1010                       |
| North Dakota   | 5                    | 17660                      |
| Ohio           | 12                   | 2286                       |
| Oklahoma       | 14                   | 9434                       |
| Oregon         | 9                    | 1264                       |
| Pennsylvania   | 2                    | 1948                       |
| South Carolina | 1                    | 6753                       |
| South Dakota   | 8                    | 17683                      |
| Tennessee      | 4                    | 4740                       |
| Texas          | 9                    | 6977                       |
| Utah           | 20                   | 5104                       |
| Virginia       | 2                    | 2133                       |
| Washington     | 7                    | 8612                       |
| West Virginia  | 6                    | 854                        |
| Wyoming        | 16                   | 6587                       |
